# Supplementary figures and images for: New photocatalyst for allylic aliphatic C–H bond activation and degradation of organic pollutants: Schiff base Ti(iv) complexes
Source: Royal Society of Chemistry journal article supplement (doi:10.1039/c5ra07616a), 2015-01-01

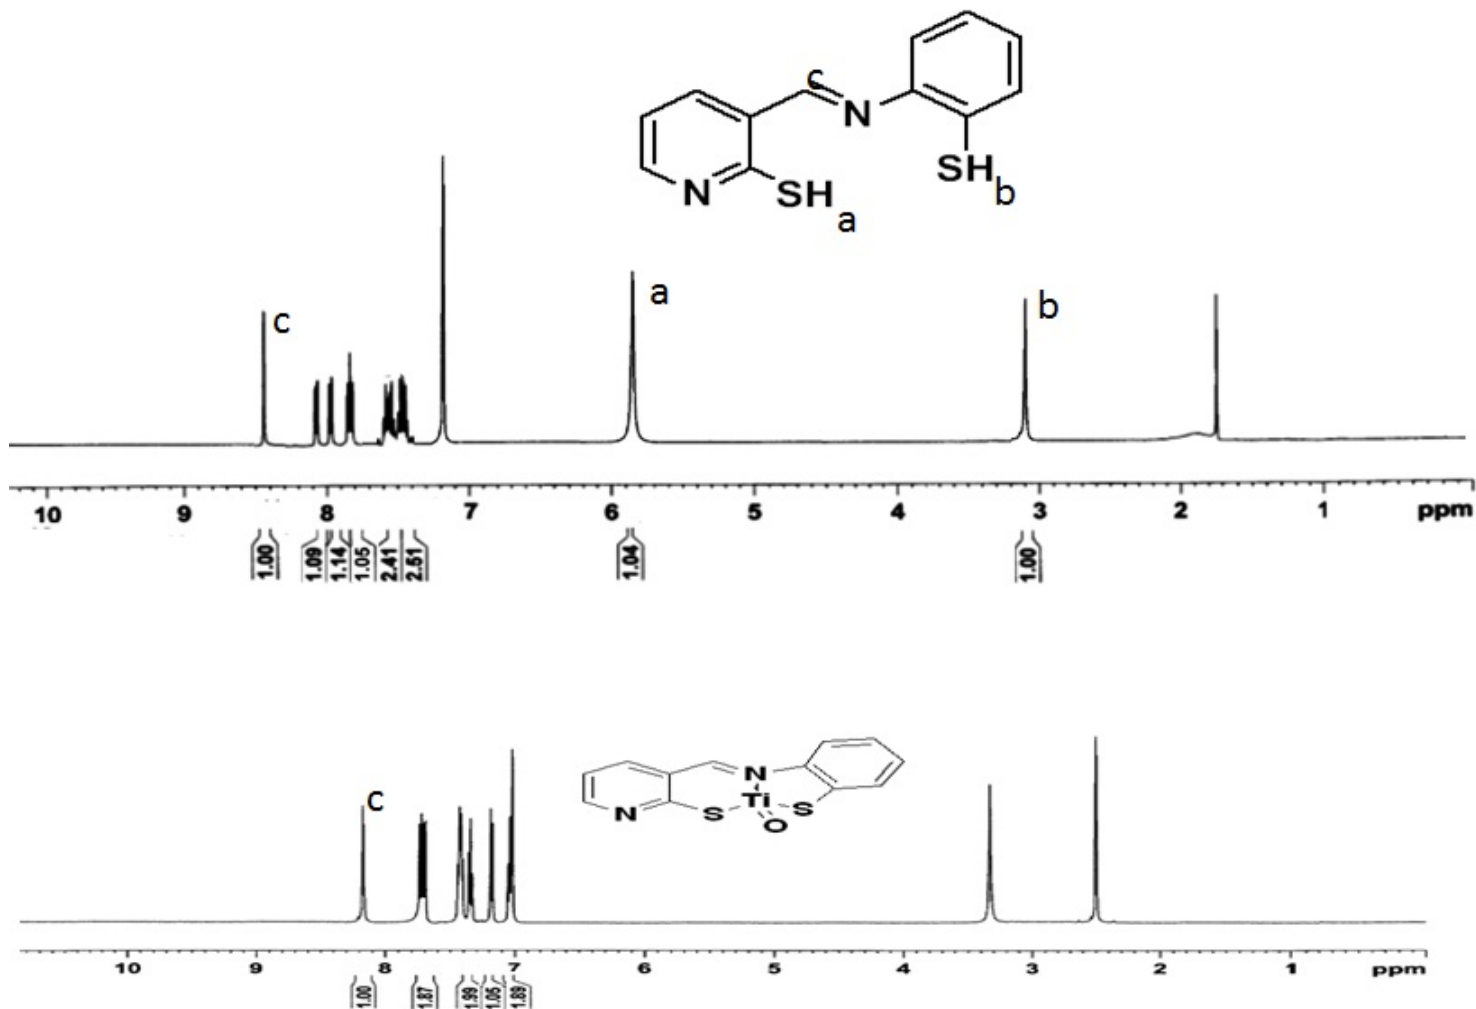

**Figure S7:  $^1\text{H-NMR}$  spectra of MPPT and Ti(MPPT)O**

Supplement: c5ra07616a10.pdf [file c5ra07616a10.pdf]

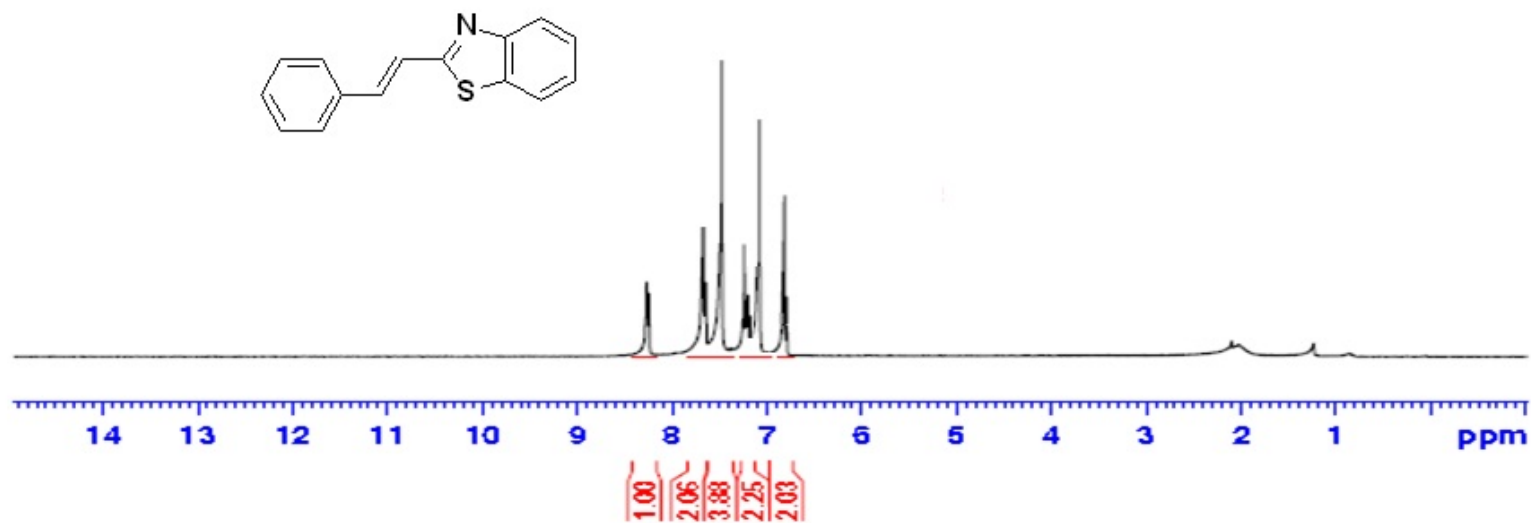

**Figure S8-b: <sup>1</sup>H-NMR spectrum of 2-styrylbenzo[d]thiazole**

Supplement: c5ra07616a12.pdf [file c5ra07616a12.pdf]

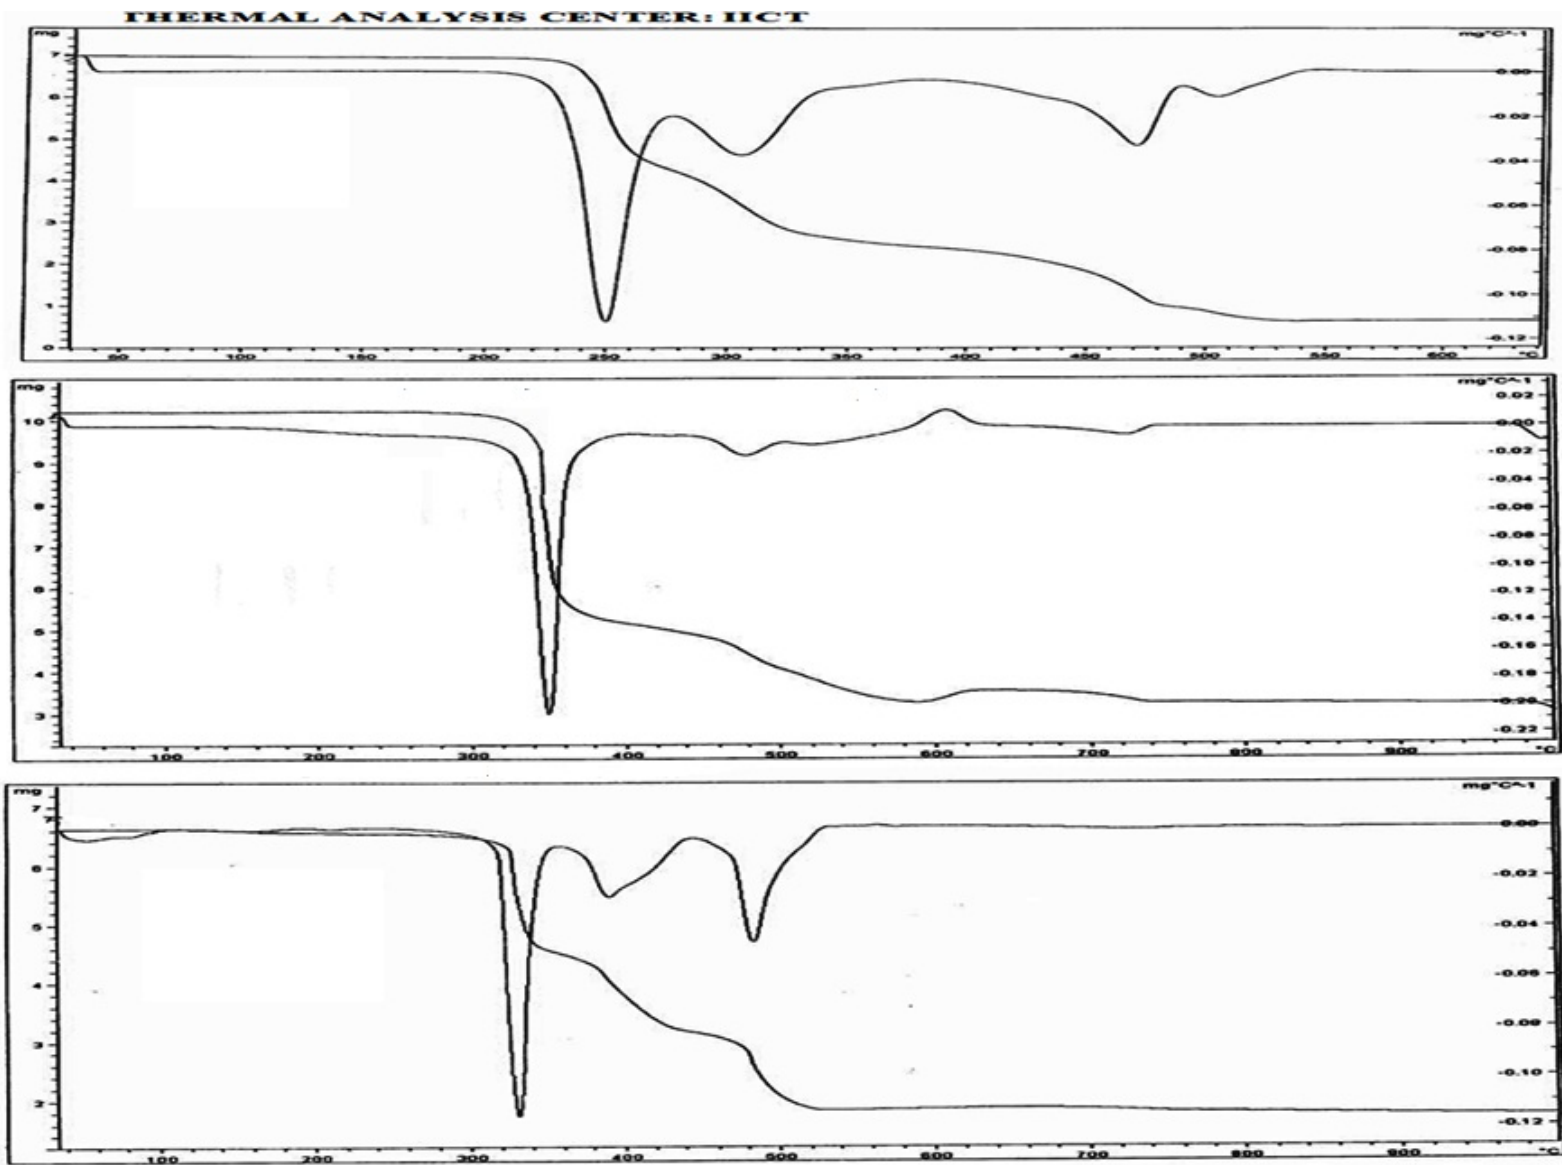

**Fig. S2 Thermograms of Ti(MPPT)O, Ti(DMPMPT)O and Ti(DCMPPT)O**

Supplement: c5ra07616a3.pdf [file c5ra07616a3.pdf]

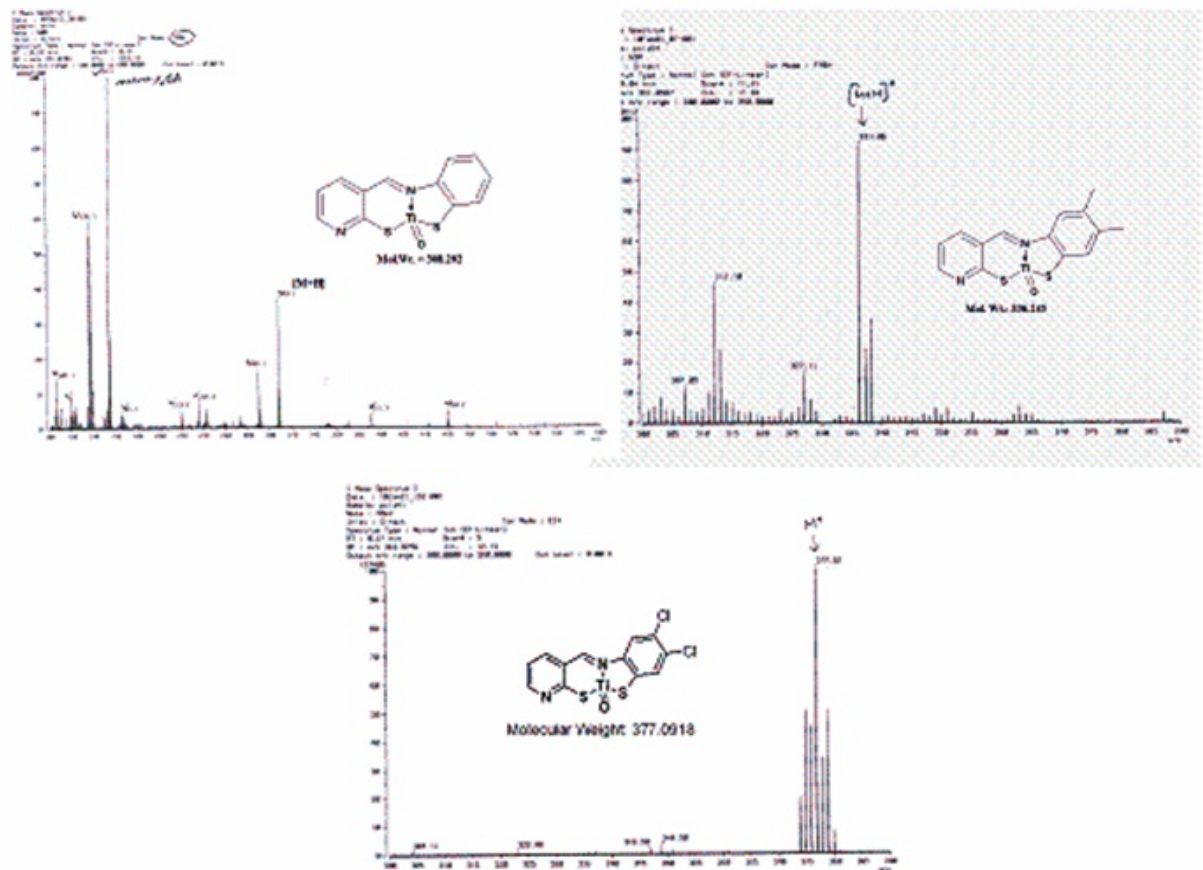

Figure S3: Mass spectra of Ti(MPPT)O, Ti(DMPMPT)O and Ti(DCMPPT)O

Supplement: c5ra07616a4.pdf [file c5ra07616a4.pdf]

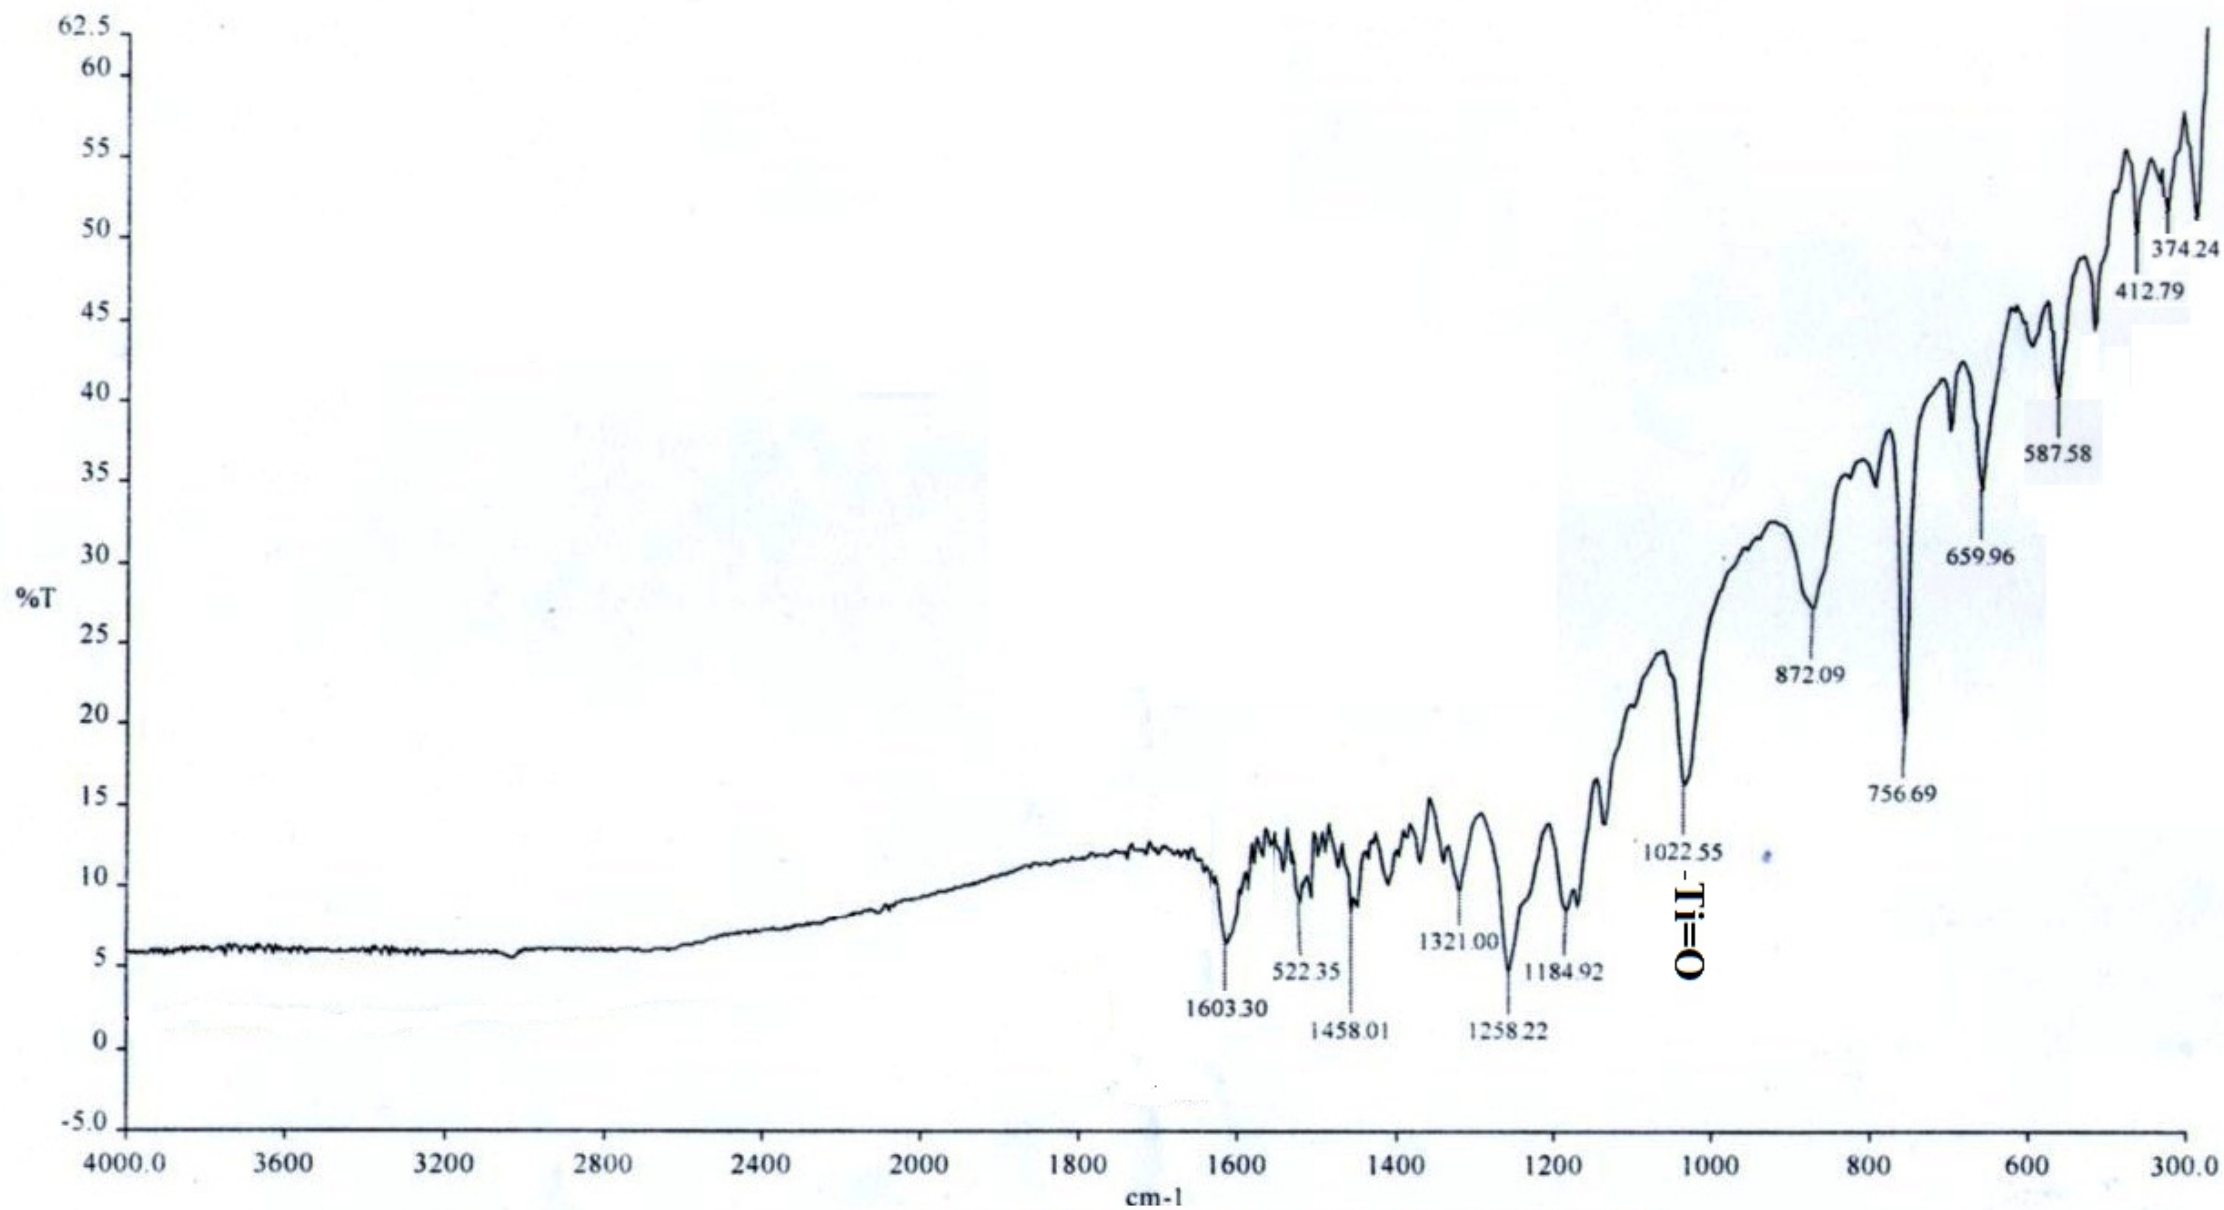

Figure S4-a: IR spectrum of Ti(MPPT)O

Supplement: c5ra07616a5.pdf [file c5ra07616a5.pdf]

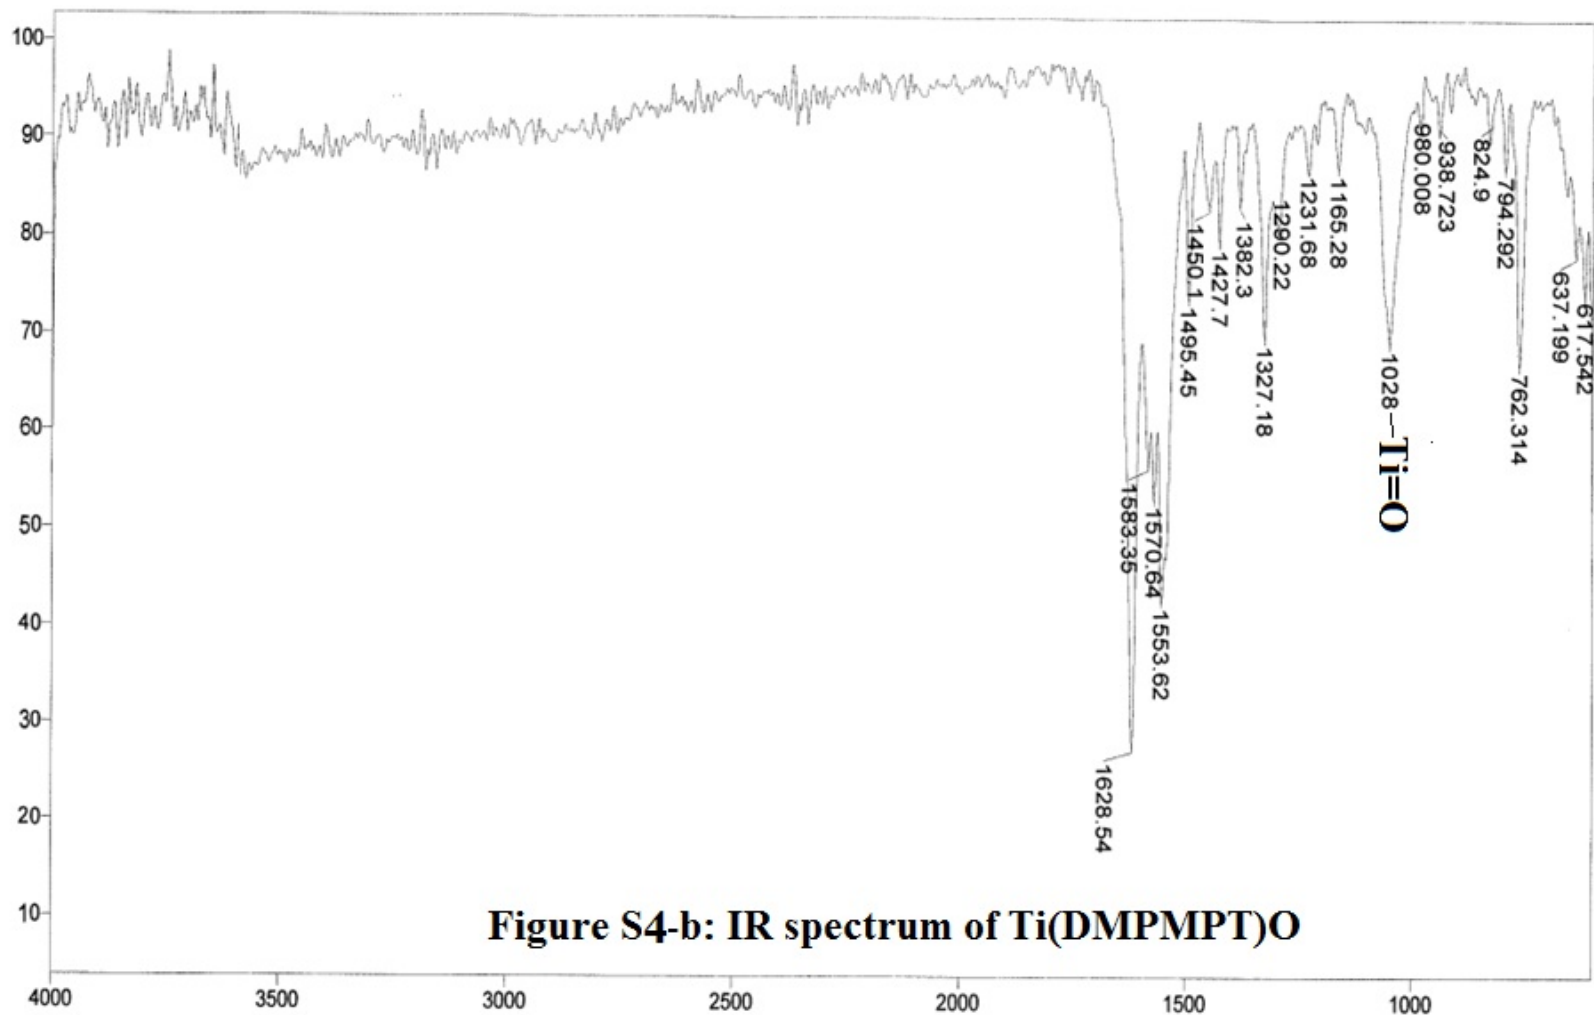

**Figure S4-b: IR spectrum of Ti(DMPMPT)O**

Supplement: c5ra07616a6.pdf [file c5ra07616a6.pdf]

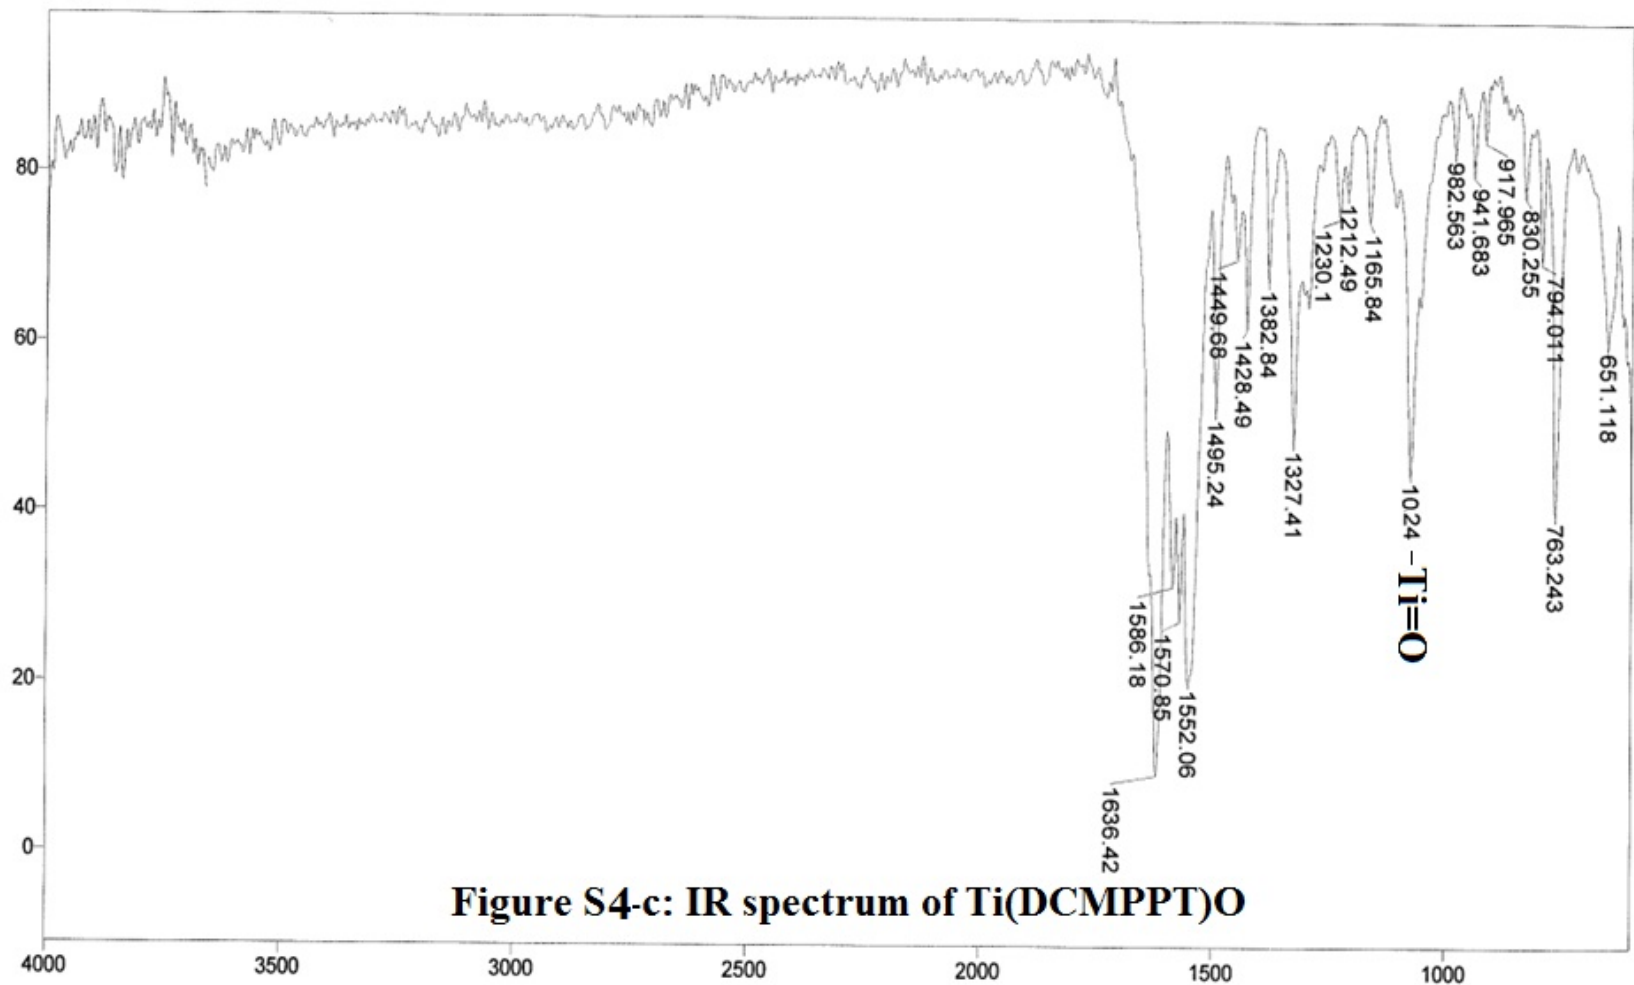

**Figure S4-c: IR spectrum of Ti(DCMPPT)O**

Supplement: c5ra07616a7.pdf [file c5ra07616a7.pdf]

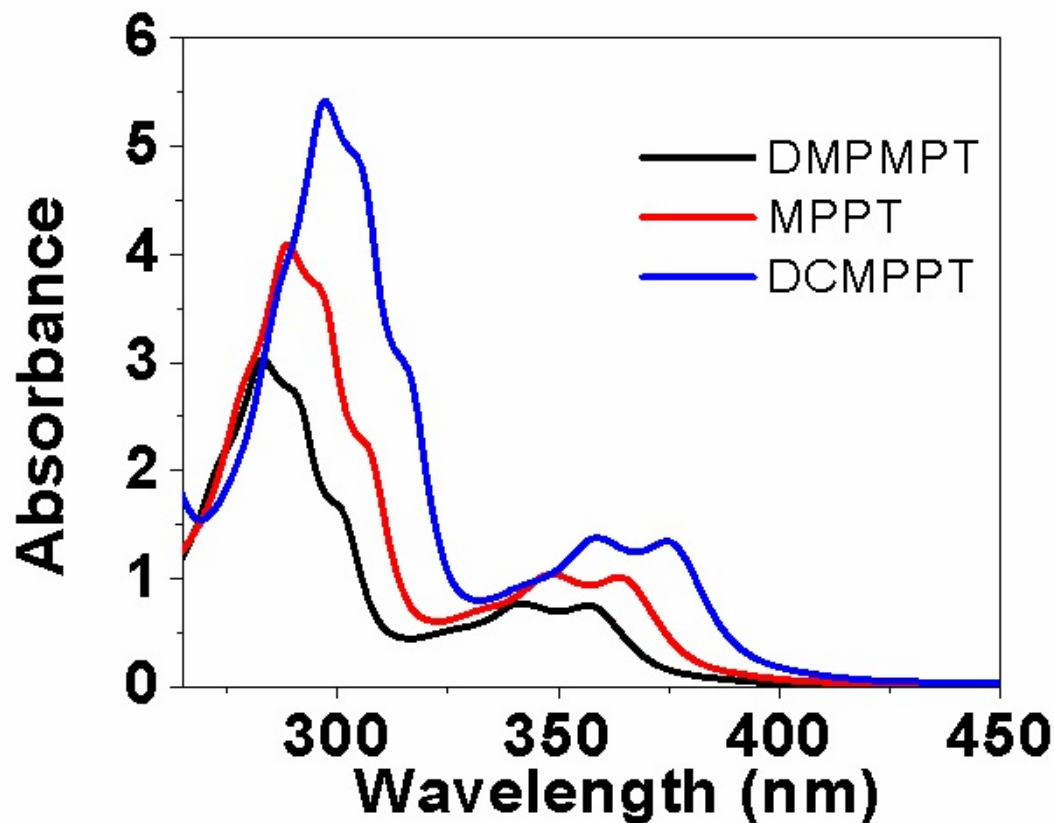

**Figure S5: UV spectra of MPPT, DMPMPT and DCMPT**

Supplement: c5ra07616a8.pdf [file c5ra07616a8.pdf]

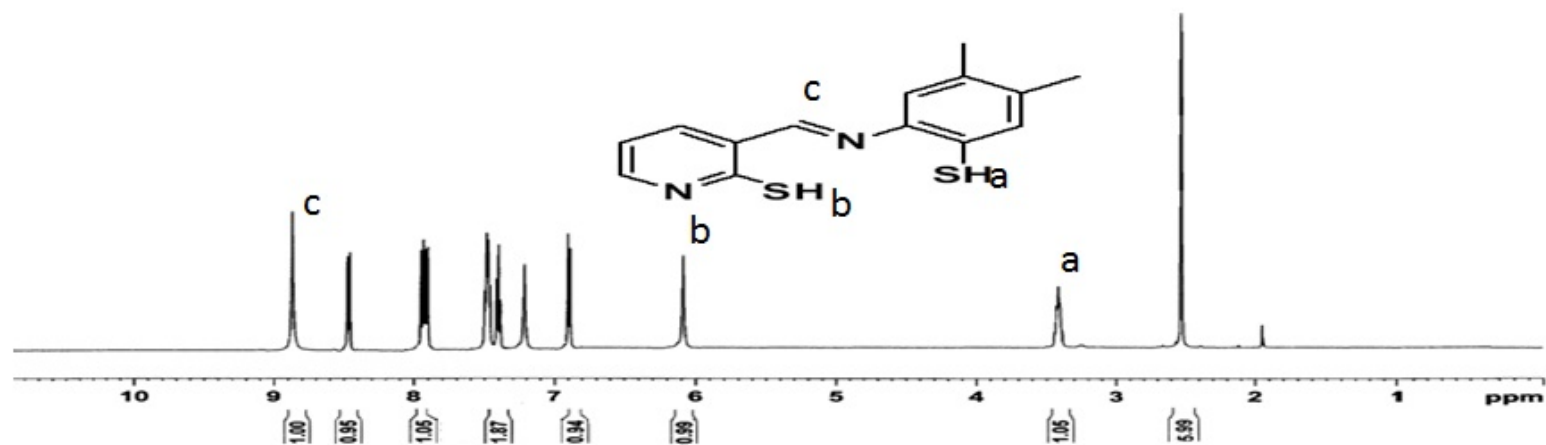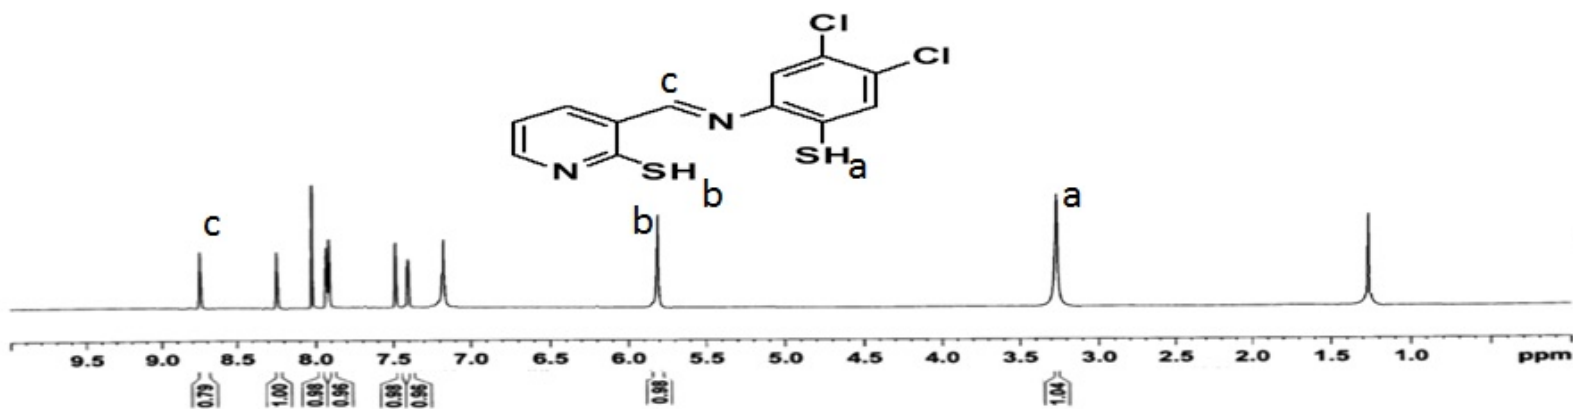

**Figure S6: <sup>1</sup>H-NMR spectra of DMPMPT and DCMPT**

Supplement: c5ra07616a9.pdf [file c5ra07616a9.pdf]
